# Supplementary material
Source: publisher figshare collection journal article supplement (https://acs.figshare.com/ndownloader/files/12394010)
Supplement: Supplementary file 1 [file 12394010]

**Supporting Information**

**Controllable Microfluidic Fabrication of Magnetic Hybrid  
Microswimmers with Hollow Helical Structures**

*Meng-Jiao Tang,<sup>†</sup> Wei Wang,<sup>\*†‡</sup> Zhi-Lu Li,<sup>†</sup> Zi-Ming Liu,<sup>†</sup> Zhi-Yu Guo,<sup>†</sup> Hua-Yu Tian,<sup>†</sup>  
Zhuang Liu,<sup>†‡</sup> Xiao-Jie Ju,<sup>†‡</sup> Rui Xie,<sup>†‡</sup> and Liang-Yin Chu<sup>†‡</sup>*

<sup>†</sup>School of Chemical Engineering, Sichuan University, Chengdu, Sichuan 610065, P. R. China

<sup>‡</sup>State Key Laboratory of Polymer Materials Engineering, Sichuan University, Chengdu, Sichuan 610065, P. R. China

<sup>\*</sup>Corresponding Author. *E-mail:* wangwei512@scu.edu.cn (W.W.)

**Part I. Supplementary Figures S1-S4**

**Part II. Supplementary Movies S1-S2**

**Part I. Supplementary Figures S1-S4**

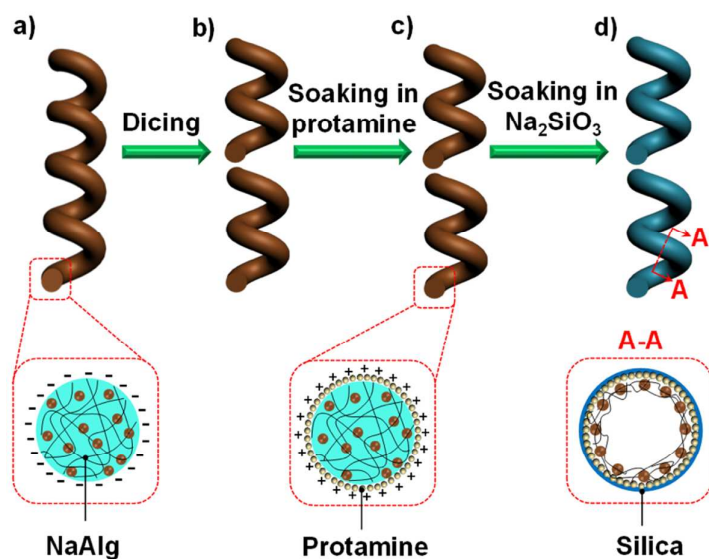

**Figure S1.** Schematic illustration for fabrication of magnetic hybrid microswimmers with hollow helical shapes consisting of closed compartmental structure. (a-d) Controlled dicing of the magnetic helical microfibers (a-b), followed with biosilicification via two sequential soaking steps for protamine coating (c), and then silica coating and Ca-Alg decomposition (d) to create the magnetic hybrid microswimmers with closed compartment.

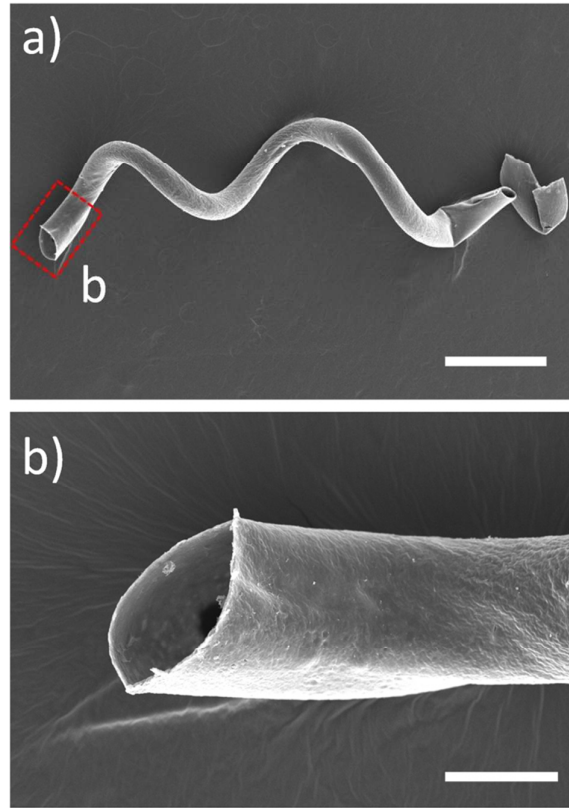

**Figure S2.** SEM images of a magnetic hybrid microswimmer (a) with hollow helical shape containing open tubular structure (b). Scale bars are 250  $\mu\text{m}$  in (a) and 50  $\mu\text{m}$  in (b).

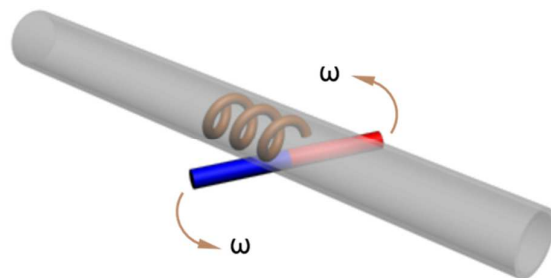

**Figure S3.** Schematic illustration showing the setup of the capillary device and the permanent magnet for studying the rotation-based locomotion of magnetic hybrid microswimmers.

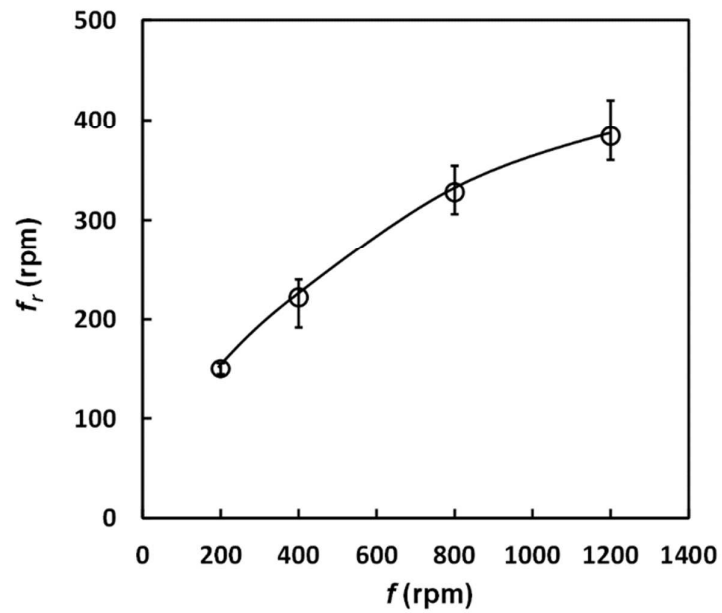

**Figure S4.** Effect of rotating frequency of the magnet ( $f$ ) on the rotating frequency of the magnetic hybrid microswimmer ( $f_s$ ). For the locomotion,  $\mu= 1.03$  mPa·s, pitch= 720  $\mu\text{m}$ , and  $C_{\text{MNPs}}= 5$  wt%.

## **Part II. Supplementary Movies S1-S2**

**Movies S1:** Rotation-based Locomotion of Magnetic Hybrid Microswimmer in a Capillary

**Movies S2:** Magnetic Hybrid Microswimmer for Cargo Transport
